# Supplementary material for: Folate pathway gene expression differs in subtypes of acute lymphoblastic leukemia and influences methotrexate pharmacodynamics
Source: JCI journal article supplement (doi:10.1172/jci22477), 2005-01-03

Supplemental Information for:

**Folate Pathway Gene Expression Differs in Subtypes of Acute  
Lymphoblastic Leukemia and Influences Methotrexate Pharmacodynamics**

Leo Kager,<sup>1,2,3,7</sup> Meyling Cheok,<sup>1,2,7</sup> Wenjian Yang,<sup>1,2</sup> Gianluigi Zaza,<sup>1,2</sup> Qing Cheng,<sup>1,2</sup>

John C. Panetta,<sup>1,2</sup> Ching-Hon Pui,<sup>1,4,5</sup> James R. Downing,<sup>1,6</sup> Mary V. Relling,<sup>1,2,4</sup>

William E. Evans<sup>1,2,4</sup>

<sup>1</sup>Hematological Malignancies Program and <sup>2</sup>Department of Pharmaceutical Sciences, St. Jude Children's Research Hospital, Memphis, Tennessee, USA

<sup>3</sup>Department of Hematology-Oncology, St. Anna Children's Hospital, Vienna, Austria

<sup>4</sup>University of Tennessee, Memphis, Tennessee, USA

<sup>5</sup>Department of Hematology-Oncology and <sup>6</sup>Department of Pathology, St. Jude Children's Research Hospital, Memphis, Tennessee, USA

<sup>7</sup>These authors contributed equally to this work

**Correspondence:**

Dr. William Evans

Office of the Scientific Director

St. Jude Children's Research Hospital

332 North Lauderdale St.

Memphis, 38105 TN, USA

Phone: 901-495-3663; Fax: 901-525-6869; E-mail: [William.evans@stjude.org](mailto:William.evans@stjude.org)

## Table of Contents

|                                                                                                            |    |
|------------------------------------------------------------------------------------------------------------|----|
| 1. MTX pathway genes and 'Candidate gene approach' .....                                                   | 3  |
| Figure S 1: The methotrexate polyglutamate (MTXPG) pathway. ....                                           | 3  |
| Table S 1: 'Candidate' folate pathway genes.....                                                           | 4  |
| 2. Patients .....                                                                                          | 6  |
| Figure S 2: Summary of patients included in the study.....                                                 | 6  |
| 3. Real time RT-PCR .....                                                                                  | 6  |
| Figure S 3: Real-time (TaqMan) RT-PCR vs. GeneChip .....                                                   | 8  |
| Figure S 4: Gene expression pattern of four folate pathway genes discriminating ALL genetic subtypes. .... | 9  |
| 4. Correlation between MTXPG accumulation and expression of folate pathway genes in BNHD ALL.....          | 10 |
| Figure S 5: Total MTXPG levels versus <i>TYMS</i> mRNA expression.....                                     | 10 |
| Figure S 6: Total MTXPG levels versus <i>TYMS</i> and <i>MTHFD1</i> expression in BNHD.....                | 10 |
| 5. Correlation between S-Phase and expression of folate pathway genes.....                                 | 11 |
| Figure S 7: Percentage S-Phase versus <i>DHFR</i> and <i>TYMS</i> expression.....                          | 11 |

## 1. MTX pathway genes and 'Candidate gene approach'

**Figure S 1: The methotrexate polyglutamate (MTXPG) pathway.**

Schematic diagram depicting proteins which are known to contribute to cellular methotrexate polyglutamate (MTXPG) accumulation. MTX enters cells primarily via the reduced folate carrier (RFC or SLC19A1). Other import routes include folate receptors (FRs), and in acidic milieu 'low pH MTX transport activity' (low pH). In the cytosol, MTX is glutamylated to MTXPG<sub>2-7</sub> by folylpolyglutamate synthase (FPGS). In lysosomes, MTXPGs can be converted back to the parental drug by gamma-glutamyl hydrolase (GGH). MTX can be effluxed by ABC-transporters, namely multidrug resistance-associated proteins 1 to 4 (MRP1-4 or ABCC1-4), breast cancer resistance protein (BCRP or ABCG2), and under certain conditions by P-glycoprotein (MDR1 or ABCB1). In addition, short chain MTXPGs are substrates for BCRP. Unidirectional importers are in white, unidirectional exporter in black, and bidirectional transporter in grey.

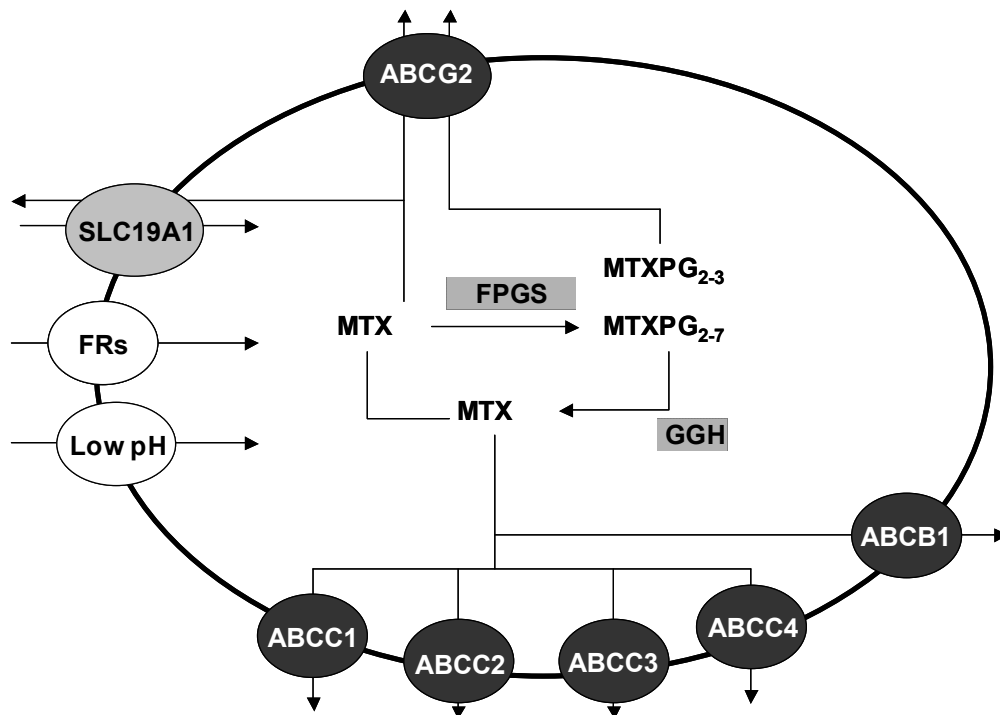

**Table S 1: ‘Candidate’ folate pathway genes**

Selected 32 ‘candidate’ genes (53 probe sets) involved in cellular folate/antifolate metabolism. Genes were selected from Kyoto Encyclopedia of Genes and Genomes (KEGG) pathway database for ‘Human’ and **A.** ‘Folate biosynthesis’, **B.** ‘One carbon pool by folate’. MTX transporter and additional genes known to be of importance in folate/antifolate metabolism but not found in KEGG pathway database are listed in **C.** Probes (and corresponding genes) that did not pass the ‘detection call’ filter (>95% absent calls) and were therefore not included into further analyses are highlighted in grey (9 genes). Superscripted numbers (<sup>1-4</sup>) indicate highly correlated transcripts (correlation coefficient  $r > 0.4$ ) within a set of probes encoding for one gene. These transcripts were combined into one expression variable as described in the Methods and Results of the main manuscript. Probe sets representing the same gene with expression not correlated, were considered independent transcripts (i.e., for *GART* and *PPAT*).

**A. ‘Folate biosynthesis’**

| Gene Symbol   | Probe Set ID                                                                                                    | Public ID                                        | Gene name                                 | Chromosome    |
|---------------|-----------------------------------------------------------------------------------------------------------------|--------------------------------------------------|-------------------------------------------|---------------|
| <i>RUVBL2</i> | 201459_at                                                                                                       | NM_006666                                        | RuvB, E. coli, homolog-like 2             | 19q13.3       |
| <i>FPGS</i>   | 202945_at                                                                                                       | NM_004957                                        | folypolyglutamate synthase                | 9cen-q34      |
| <i>SPR</i>    | 203458_at                                                                                                       | AI951454                                         | sepiapterin reductase                     | 2p14-p12      |
| <i>GGH</i>    | 203560_at                                                                                                       | NM_003878                                        | gamma-glutamyl hydrolase                  | 8q12.2        |
| <i>GCH1</i>   | 204224_s_at                                                                                                     | NM_000161                                        | GTP cyclohydrolase 1                      | 14q22.1-q22.2 |
| <i>PTS</i>    | 209694_at                                                                                                       | M97655                                           | 6-pyruvoyltetrahydropterin synthase       | 11q22.3-q23.3 |
| <i>ALPI</i>   | 211618_s_at                                                                                                     | M31008                                           | alkaline phosphatase, intestinal          | 2q37.1        |
| <i>MTHFD1</i> | 202309_at                                                                                                       | NM_005956                                        | methylenetetrahydrofolate dehydrogenase 1 | 14q24         |
| <i>DHFR</i>   | 202532_s_at <sup>1</sup> ,<br>202533_s_at <sup>1</sup> ,<br>202534_x_at <sup>1</sup> ,<br>48808_at <sup>1</sup> | BC000192,<br>BC003584,<br>NM_000791,<br>AI144299 | dihydrofolate reductase                   | 5q11.2-q13.2  |
| <i>TYMS</i>   | 202589_at,<br>217684_at,<br>217690_at                                                                           | NM_001071,<br>BG281679,<br>BG281679              | thymidylate synthetase                    | 18p11.32      |

**B. 'One carbon pool by folate'.**

| Gene Symbol   | Probe Set ID                                                                                                 | Public ID                                                   | Gene product                                                                       | Chromosome   |
|---------------|--------------------------------------------------------------------------------------------------------------|-------------------------------------------------------------|------------------------------------------------------------------------------------|--------------|
| <i>MTHFD2</i> | 201761_at                                                                                                    | NM_006636                                                   | methylenetetrahydrofolate dehydrogenase 2                                          | 2p13.1       |
| <i>MTHFS</i>  | 203433_at                                                                                                    | NM_006441                                                   | 5,10-methenyltetrahydrofolate synthetase                                           | 15q24.3      |
| <i>ATIC</i>   | 208758_at                                                                                                    | D89976                                                      | 5-aminoimidazole-4-carboxamide ribonucleotide formyltransferase/IMP cyclohydrolase | 2q35         |
| <i>GART</i>   | 210005_at,<br>212378_at <sup>2</sup> ,<br>212379_at <sup>2</sup> ,<br>216990_at,<br>217445_s_at <sup>2</sup> | D32051,<br>NM_000819,<br>BE966876,<br>AF008655,<br>AF008655 | phosphoribosylglycinamide formyltransferase,                                       | 21q22.1      |
| <i>FTCD</i>   | 220604_x_at                                                                                                  | NM_006657                                                   | formiminotransferase cyclodeaminase                                                | 21q22.3      |
| <i>SHMT1</i>  | 209980_s_at                                                                                                  | L23928                                                      | serine hydroxymethyltransferase 1                                                  | 17p11.2      |
| <i>MTR</i>    | 203774_at                                                                                                    | NM_000254                                                   | 5-methyltetrahydrofolate-homocysteine methyltransferase                            | 1q43         |
| <i>AMT</i>    | 204294_at                                                                                                    | NM_000481                                                   | aminomethyltransferase                                                             | 3p21.2-p21.1 |
| <i>FTHFD</i>  | 205208_at,<br>215798_at                                                                                      | NM_012190,<br>AL133015                                      | formyltetrahydrofolate dehydrogenase                                               | 3q21.2       |

**C. Other genes involved in folate/antifolate metabolism**

| Gene Symbol    | Probe Set ID                                                | Representative Public ID                      | Gene product                                                                    | Chromosome    |
|----------------|-------------------------------------------------------------|-----------------------------------------------|---------------------------------------------------------------------------------|---------------|
| <i>MTHFR</i>   | 206800_at,<br>217070_at,<br>217071_s_at                     | NM_005957,<br>AJ249275,<br>AJ249275           | 5,10-methylenetetrahydrofolate reductase (NADPH)                                | 1p36.3        |
| <i>PPAT</i>    | 209433_s_at,<br>209434_s_at                                 | AI457120,<br>U00238                           | phosphoribosyl pyrophosphate amidotransferase                                   | 4q12          |
| <i>FTH1</i>    | 200748_s_at <sup>3</sup> ,<br>214211_at <sup>3</sup>        | NM_002032                                     | ferritin, heavy polypeptide 1                                                   | 11q13         |
| <i>ABCC1</i>   | 202804_at <sup>4</sup> ,<br>202805_s_at <sup>4</sup>        | AI539710,<br>NM_004996                        | ATP-binding cassette, sub-family C (CFTR/MRP), member 1, MRP1                   | 16p13.1       |
| <i>ABCC4</i>   | 203196_at                                                   | AI948503                                      | ATP-binding cassette, sub-family C (CFTR/MRP), member 4, MRP4                   | 13q32         |
| <i>FOLR1</i>   | 204437_s_at                                                 | NM_016725                                     | folate receptor 1 (adult)                                                       | 11q13.3-q14.1 |
| <i>FOLR2</i>   | 204829_s_at                                                 | NM_000803                                     | folate receptor 2 (fetal)                                                       | 11q13.3-q13.5 |
| <i>ABCC2</i>   | 206155_at                                                   | NM_000392                                     | ATP-binding cassette, sub-family C (CFTR/MRP), member 2, MRP2                   | 10q24         |
| <i>FOLR3</i>   | 206371_at                                                   | NM_000804                                     | folate receptor 3 (gamma)                                                       | 11q13         |
| <i>ABCC3</i>   | 208161_s_at,<br>214979_at,<br>209641_s_at                   | NM_020037,<br>AK000791,<br>AF009670           | ATP-binding cassette, sub-family C (CFTR/MRP), member 3, MRP3                   | 17q22         |
| <i>ABCG2</i>   | 209735_at                                                   | AF098951                                      | ATP-binding cassette, sub-family G (WHITE), member 2, BCRP                      | 4q22          |
| <i>SLC19A1</i> | 209775_x_at,<br>209776_s_at,<br>209777_s_at,<br>211576_s_at | AI917627,<br>U15939,<br>AF004354,<br>BC003068 | solute carrier family 19 (folate transporter), member 1, reduced folate carrier | 21q22.3       |
| <i>ABCB1</i>   | 209993_at,<br>209994_s_at                                   | AF016535,<br>AF016535                         | ATP-binding cassette, sub-family B (MDR/TAP), member 1, Pgp                     | 2q24          |

## 2. Patients

**Figure S 2: Summary of patients included in the study.**

Only patients with unequivocally proven ALL subtypes were included, that is a result (positive or negative) for *BCR-ABL*, *TEL-AML1*, *E2A-PBX1* and *MLL* rearranged was required, if any one of these tests were not done or uncertain the patient was excluded.

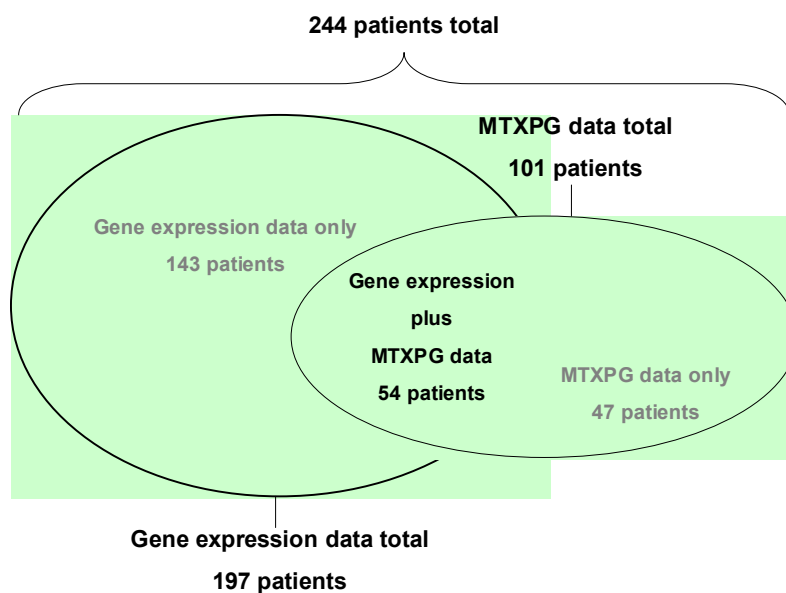

## 3. Real time RT-PCR

Gene expression was also determined by real time RT-PCR assays (reverse transcription polymerase chain reaction) in four patient samples for four selected genes, i.e., breast cancer resistance protein, *ABCG2*; 5-aminoimidazole-carboxamid ribonucleotide formyltransferase, *ATIC*, thymidylate synthetase, *TYMS*, and methylenetetrahydrofolate dehydrogenase 1, *MTHFD1*. Reactions were performed using TaqMan Universal PCR Master Mix Kit and the 7900-sequence-detection system (Applied Biosystems).

Two-hundred ng of total RNA was treated with Dnase I and reverse transcribed using Superscript II RNase H<sup>-</sup> reverse transcriptase and oligo dT primers (Invitrogen). Additionally, controls that contained either no template or no reverse transcriptase were included as negative controls in each run. Aliquots (1 µl) of RT reaction mixture (20 µl) were used for quantification of *TYMS*, *MTHFD1*, *ABCG2*, *ATIC* and *Rnase P* gene expression. The housekeeping gene, *Rnase P* (Applied Biosystems), was used for normalization.

The total volume of PCR reaction was 50 µl of RT-product, 400 nM each of the forward and reverse primers, 250 nM of probe, and 1X master mix. The following thermal cycling parameters were used: two minutes at 50°C (activation of UNG enzyme to remove the carry-over PCR products), ten minutes at 95°C to activate AmpliTaq Gold DNA polymerase, 15 seconds at 95°C to denature and one minute at 60°C for annealing and extension, for a total of 45 cycles.

To estimate the amount of each of the four mRNAs in the four patient samples, we used linear regression analysis based on a standard curve representing six serial dilutions of cDNA made from the Nalm6 human leukemia cells (American Type Culture Collection).

Real-time RT-PCR standard curves showed  $r^2 > 0.99$  for *TYMS*, *MTHFD1*, *ABCG2*, *ATIC* and *Rnase P* (data not shown). All unknown samples were analyzed in duplicate in parallel with a standardization series from Nalm6 cDNA. The relative quantification values of genes for each sample were calculated based on their C<sub>T</sub> (threshold cycle number) value and the corresponding standard curves.

The correlation ( $r^2$ ) between mRNA expression determined by real-time RT-PCR and microarray analyses was 84% for *ATIC*, 91% for *TYMS*, 75% for *ABCG2*, and 88% for *MTHFD1*, thereby confirming expression levels determined by the gene expression array.

**Figure S 3: Real-time (TaqMan) RT-PCR vs. GeneChip**

Real-time RT-PCR results are plotted versus expression levels determined by GeneChip results for *ATIC*, *TYMS*, *ABCG2* and *MTHFD1* in four patients.

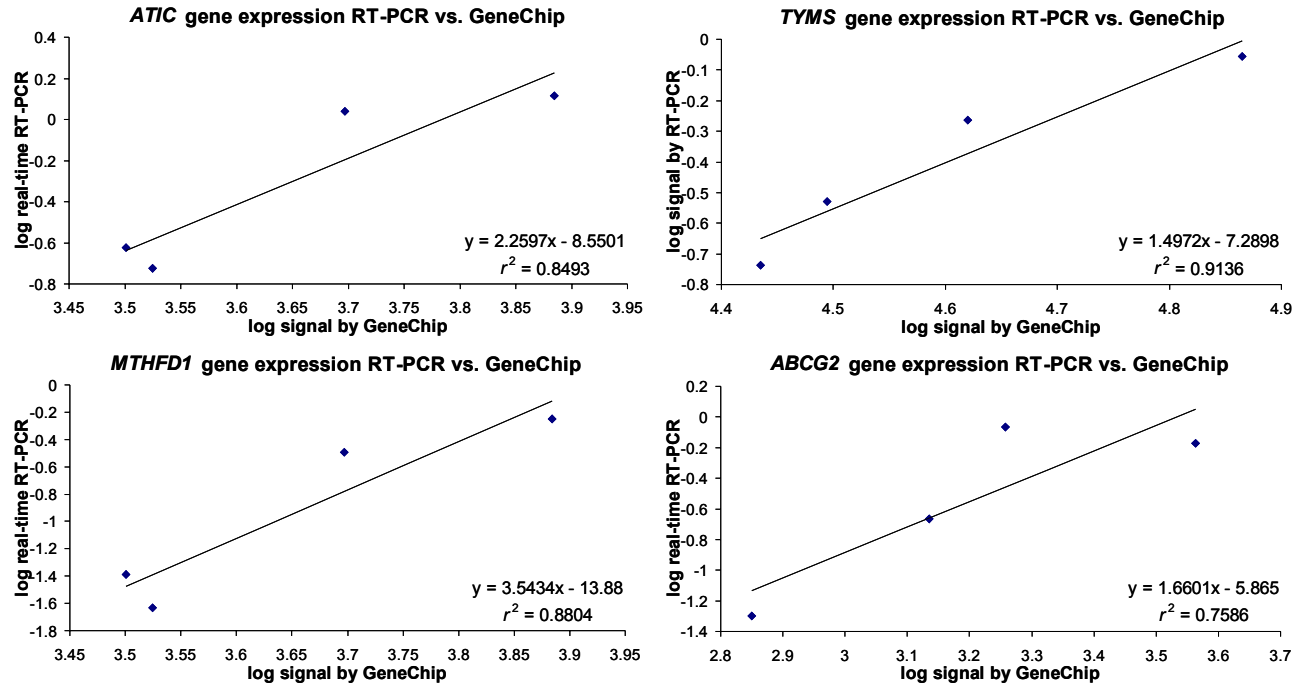



**Figure S 4: Gene expression pattern of four folate pathway genes discriminating ALL genetic subtypes.**

Box plot with medians, quartiles and range without outliers of log mRNA expression (HG-U133A GeneChip) are depicted for **A.** Methylenetetrahydrofolate dehydrogenase 1 (*MTHFD1*), **B.** Methylenetetrahydrofolate dehydrogenase 2 (*MTHFD2*), **C.** 5-aminoimidazole-4-carboxamide ribonucleotide formyltransferase/IMP cyclohydrolase (*ATIC*), and **D.** Phosphoribosylglycinamide formyltransferase (*GART*). Data from 197 patients were plotted (BHD,  $n=42$ ; BNHD,  $n=58$ ; *E2A-PBX1*,  $n=21$ ; T-ALL,  $n=35$ ; and *TEL-AML1*,  $n=41$ ; Kruskal Wallis test).

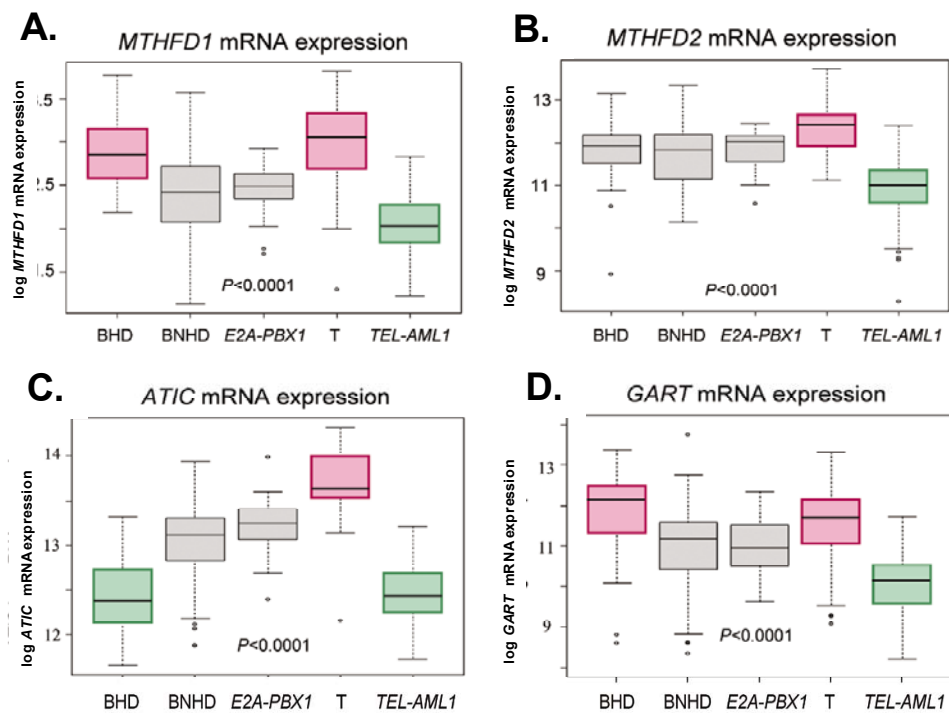

#### 4. Correlation between MTXPG accumulation and expression of folate pathway genes in ALL

**Figure S 5: Total MTXPG levels versus *TYMS* and *MTHFD1* mRNA expression.**

Data are shown for ALL cells from 54 patients. P-values are for Spearman correlation. BHD subtypes ( $n=9$ ) are depicted in red, BNHD ( $n=22$ ) in blue, *E2A-PBX1* ( $n=3$ ) in yellow, T-ALL ( $n=9$ ) in black, and *TEL-AML1* ( $n=11$ ) in green.

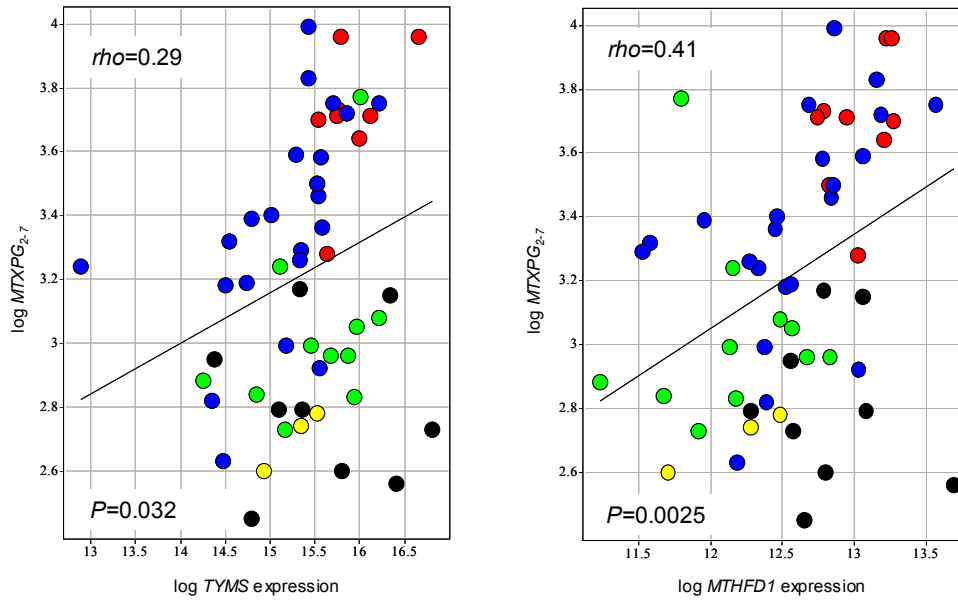

**Figure S 6: Total MTXPG levels versus *TYMS* and *MTHFD1* expression in BNHD.**

P-values are from Spearman correlation.

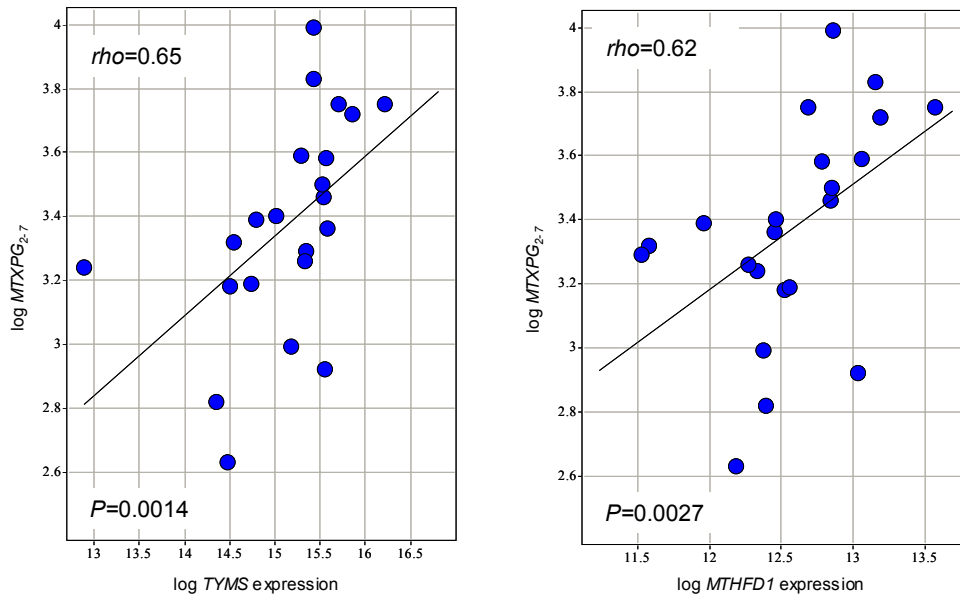

## 5. Correlation between S-Phase and expression of folate pathway genes

**Figure S 7: Percentage S-Phase versus *DHFR* and *TYMS* expression**

Data are shown for ALL cells from 52 patients. P-values are for Spearman correlation. BHD subtypes ( $n=8$ ) are depicted in red, BNHD ( $n=18$ ) in blue, *E2A-PBX1* ( $n=6$ ) in yellow, T-ALL ( $n=4$ ) in black, and *TEL-AML1* ( $n=16$ ) in green.

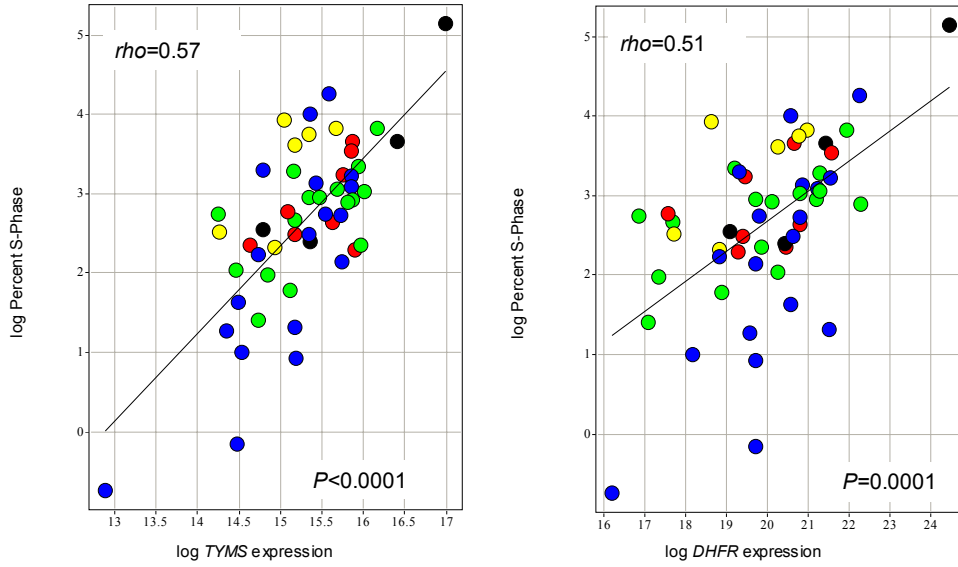

Supplement: sd1 [file 1]
